# Supplementary material
Source: PubMed Central journal article supplement (PMC5858702)
Supplement: NIHMS947771-supplement-Supplementary_figure.pdf [file NIHMS947771-supplement-Supplementary_figure.pdf]

### A Bone marrow-derived macrophages

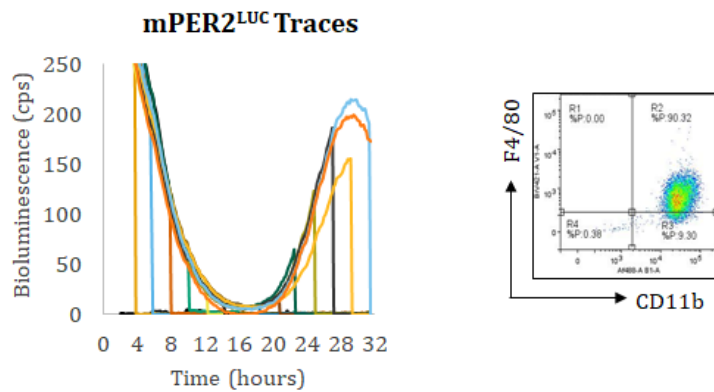

### B Peritoneum-derived macrophages

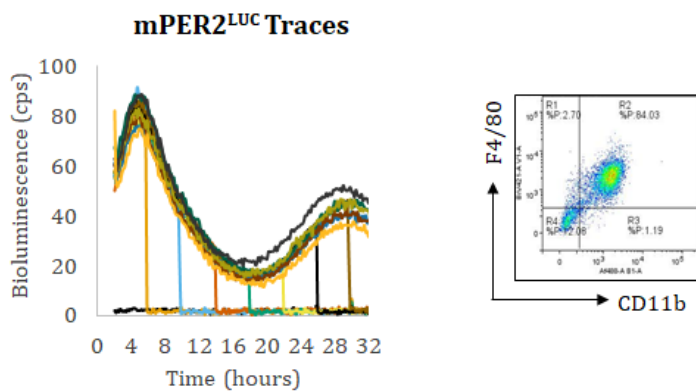

### C mPER2<sup>LUC</sup> Traces

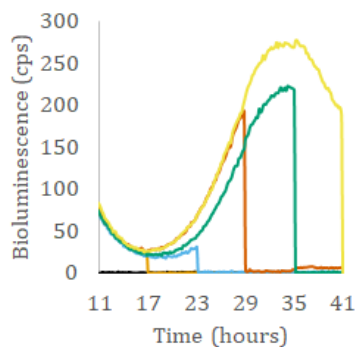

### D mPER2<sup>LUC</sup> Traces

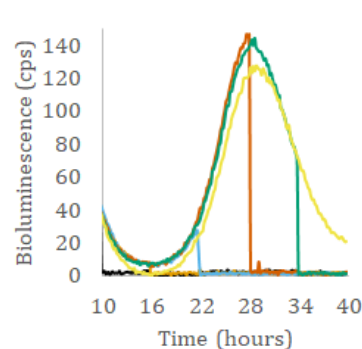

Supplementary Figure 1. mPER2<sup>LUC</sup> fusion protein expression traces from serum-synchronized (A) BMDMs and (B) peritoneal macrophages and their corresponding purity as assessed by F4/80 and CD11b expression (BioLegend, #123131 and #101217) gated on Fluorescence Minus One controls. Samples for quantitative PCR were harvested by dry freezing at -80 °C at times indicated by vertical lines in luminescence traces. Bioluminescence is measured in counts per second on a LumiCycle-32 (ActiMetrics). (C) mPER2<sup>LUC</sup> traces of the samples for Figure 2A. (D) mPER2<sup>LUC</sup> traces of wild-type BMDM samples for Figure 2B.
